# Supplementary material for: Density functional theory study of transition metal single-atoms anchored on graphyne as efficient electrocatalysts for the nitrogen reduction reaction
Source: Royal Society of Chemistry journal article supplement (doi:10.1039/d1cp00690h), 2021-01-01
Supplement: d1cp00690h1.pdf [file d1cp00690h1.pdf]

## Supporting Information

### Density functional theory study of transition metal single-atom anchored on graphyne as efficient electrocatalyst for nitrogen reduction reaction

**Wei Song<sup>a</sup>, Kun Xie<sup>d</sup>, Jinlong Wang<sup>e</sup>, Yongliang Guo<sup>a</sup>, Chaozheng He<sup>b,c\*</sup>, Ling Fu<sup>f\*</sup>**

*<sup>a</sup>School of Science, Henan Institute of Technology, Xinxiang, 453003, P.R. China*

*<sup>b</sup>School of Materials Science and Chemical Engineering, Xi'an Technological University, Xi'an, Shaanxi 710021, P.R. China*

*<sup>c</sup>Institute of Environmental and Energy Catalysis, School of Materials Science and Chemical Engineering, Xi'an Technological University, Xi'an 710021, P.R. China*

*<sup>d</sup>Henan Key Laboratory of Materials on Deep-Earth Engineering, School of Materials Science and Engineering, Henan Polytechnic University, Jiaozuo 454000, Henan, P.R. China*

*<sup>e</sup>Department of Electronic Communication Engineering, Xinxiang University, Xinxiang, 453003, P.R. China*

*<sup>f</sup>College of Resources and Environmental Engineering, Tianshui Normal University, Tianshui 741001, P.R. China*

**\*Corresponding authors:**

**E-mail: hecz2019@xatu.edu.cn (Chao-zheng He)**

**Table S1** The total energy ( $E_{total}$  in eV) of TM atoms (TM = Ti, V, Cr, Mn, Zr, Nb, Mo) adsorbed on the GY with the different adsorption sites.

| $E_{total}$ (eV) | Ti      | V       | Cr      | Mn      | Zr      | Nb      | Mo      |
|------------------|---------|---------|---------|---------|---------|---------|---------|
| H1               | -421.31 | -422.03 | -422.30 | -422.67 | -421.81 | -422.89 | -423.02 |
| H2               | -419.68 | -420.15 | -420.38 | -420.19 | -420.24 | -420.70 | -420.58 |
| B1               | —       | —       | —       | —       | —       | —       | —       |
| B2               | —       | —       | —       | —       | —       | -420.23 | —       |
| B3               | —       | —       | —       | —       | —       | -420.09 | -420.38 |
| C                | -420.80 | —       | —       | —       | -421.51 | —       | —       |

**Table S2** Binding energy ( $E_b$  in eV), distance from TM atoms to GY surface ( $d$  in Å), Bader charge for the TM atoms ( $Q_{TM}$  in  $e$ ) and total magnetic moment ( $M$  in  $\mu_B$ ) (TM = Ti, V, Cr, Mn, Zr, Nb, Mo). The negative values represent loss of electrons, respectively.

|                  | Ti    | V     | Cr    | Mn    | Zr    | Nb    | Mo    |
|------------------|-------|-------|-------|-------|-------|-------|-------|
| $E_b$ (eV)       | -4.96 | -4.28 | -2.64 | -3.34 | -5.59 | -5.56 | -4.50 |
| $d$ (Å)          | 1.36  | 1.20  | 0.99  | 0.76  | 1.61  | 1.42  | 1.28  |
| $Q_{TM}$ ( $e$ ) | -2.01 | -1.68 | -1.39 | -1.24 | -1.61 | -1.35 | -1.07 |
| $M$ ( $\mu_B$ )  | 0.00  | 0.60  | 1.43  | 2.58  | 0.00  | 0.25  | 0.73  |

**Table S3** Adsorption energy ( $E_{ads}$  in eV) of  $*NH_2$  and  $*NH_3$  adsorbed on TM@GY.

| $E_{ads}$ | Ti@GY | V@GY  | Cr@GY | Mn@GY | Zr@GY | Nb@GY | Mo@GY |
|-----------|-------|-------|-------|-------|-------|-------|-------|
| $*NH_2$   | -3.75 | -4.17 | -3.83 | -2.77 | -3.98 | -4.40 | -4.45 |
| $*NH_3$   | -1.53 | -1.68 | -1.25 | -0.80 | -1.44 | -1.67 | -1.12 |

**Table S4** Adsorption energy ( $E_{ads}$  in eV), bond length of Mn-N and N-N ( $d$  in Å), total magnetic moment ( $M$  in  $\mu_B$ ) and Bader charge ( $Q$  in  $e$ ) of various reaction intermediates adsorbed on Mn@GY via the distal and alternating pathways, and the positive and negative values represent the acquisition and loss of electrons, respectively.

| Distal                            | $E_{ads}$ (eV) | $d_{Mn-N}$ (Å) | $d_{N-N}$ (Å) | $M$ ( $\mu_B$ ) | $Q$ ( $e$ ) |
|-----------------------------------|----------------|----------------|---------------|-----------------|-------------|
| *N-N                              | -0.33          | 1.82           | 1.14          | 1.02            | 0.34        |
| *N-NH                             | -2.27          | 1.65           | 1.22          | 0.00            | 0.52        |
| *N-NH <sub>2</sub>                | -2.79          | 1.62           | 1.30          | 0.00            | 0.34        |
| *N                                | -5.45          | 1.54           | —             | 0.00            | 0.72        |
| *NH                               | -4.02          | 1.60           | —             | 0.00            | 0.53        |
| *NH <sub>2</sub>                  | -2.83          | 1.77           | —             | 0.58            | 0.32        |
| *NH <sub>3</sub>                  | -0.87          | 2.10           | —             | 2.19            | -0.11       |
| Alternating                       | $E_{ads}$ (eV) | $d_{Mn-N}$ (Å) | $d_{N-N}$ (Å) | $M$ ( $\mu_B$ ) | $Q$ ( $e$ ) |
| *N-N                              | -0.33          | 1.82           | 1.14          | 1.02            | 0.34        |
| *N-NH                             | -2.27          | 1.65           | 1.22          | 0.00            | 0.52        |
| *NH-NH                            | -1.53          | 1.82           | 1.28          | 1.03            | 0.31        |
| *NH-NH <sub>2</sub>               | -2.10          | 1.76           | 1.38          | 0.49            | 0.15        |
| *NH <sub>2</sub> -NH <sub>2</sub> | -1.05          | 2.08           | 1.45          | 2.05            | -0.10       |
| *NH <sub>2</sub>                  | -2.83          | 1.77           | —             | 0.58            | 0.32        |
| *NH <sub>3</sub>                  | -0.87          | 2.10           | —             | 2.19            | -0.11       |

**Table S5** Adsorption energy ( $E_{ads}$  in eV), bond length of V-N and N-N ( $d$  in Å), total magnetic moment ( $M$  in  $\mu_B$ ) and Bader charge ( $Q$  in  $e$ ) of various reaction intermediates adsorbed on V@GY via the enzymatic pathways, and the positive and negative values represent the acquisition and loss of electrons, respectively.

| Enzymatic | $E_{ads}$ (eV) | $d_{V-N}$ (Å) | $d_{N-N}$ (Å) | $M$ ( $\mu_B$ ) | $Q$ ( $e$ ) |
|-----------|----------------|---------------|---------------|-----------------|-------------|
|-----------|----------------|---------------|---------------|-----------------|-------------|

|                                    |       |      |           |      |       |
|------------------------------------|-------|------|-----------|------|-------|
| *N-*N                              | -0.60 | 1.17 | 2.12/2.15 | 0.74 | 0.45  |
| *N-*NH                             | -2.71 | 1.25 | 1.97/1.96 | 0.00 | 0.56  |
| *NH-*NH                            | -2.45 | 1.33 | 1.98/2.01 | 0.58 | 0.52  |
| *NH-*NH <sub>2</sub>               | -3.40 | 1.40 | 2.19/1.86 | 0.00 | 0.45  |
| *NH <sub>2</sub> -*NH <sub>2</sub> | -1.93 | 1.45 | 2.18/2.16 | 0.00 | -0.17 |
| *NH <sub>2</sub> -*NH <sub>3</sub> | -4.44 | 1.87 | —         | 0.00 | 0.46  |
| *NH <sub>3</sub>                   | -1.76 | 2.13 | —         | 0.00 | -0.10 |

**Table S6** The  $\Delta ZPE$  and  $\Delta S$  values of various reaction intermediates adsorbed on Mn@GY via the distal and alternating pathways, and V@GY via the enzymatic pathways.

|              |          |          |                    |                      |                                    |                                    |                  |
|--------------|----------|----------|--------------------|----------------------|------------------------------------|------------------------------------|------------------|
| Distal       | *N-N     | *N-NH    | *N-NH <sub>2</sub> | *N                   | *NH                                | *NH <sub>2</sub>                   | *NH <sub>3</sub> |
| $\Delta ZPE$ | 0.203154 | 0.478745 | 0.798123           | 0.096019             | 0.333621                           | 0.675701                           | 1.007576         |
| $\Delta S$   | 0.000568 | 0.000573 | 0.000511           | 0.000149             | 0.000334                           | 0.000343                           | 0.000527         |
| Alternating  | *N-N     | *N-NH    | *NH-NH             | *NH-NH <sub>2</sub>  | *NH <sub>2</sub> -NH <sub>2</sub>  | *NH <sub>2</sub>                   | *NH <sub>3</sub> |
| $\Delta ZPE$ | 0.203154 | 0.478745 | 0.806456           | 1.141680             | 1.479819                           | 0.675701                           | 1.007576         |
| $\Delta S$   | 0.000568 | 0.000573 | 0.000631           | 0.000673             | 0.000892                           | 0.000343                           | 0.000527         |
| Enzymatic    | *N-*N    | *N-*NH   | *NH-*NH            | *NH-*NH <sub>2</sub> | *NH <sub>2</sub> -*NH <sub>2</sub> | *NH <sub>2</sub> -*NH <sub>3</sub> | *NH <sub>3</sub> |
| $\Delta ZPE$ | 0.171071 | 0.486798 | 0.759923           | 1.135869             | 1.462867                           | 1.442786                           | 1.007576         |
| $\Delta S$   | 0.000697 | 0.000550 | 0.000670           | 0.000627             | 0.000696                           | 0.001319                           | 0.000527         |

**Table S7** Adsorption energy ( $E_{ads}$  in eV), Bader charge on Mn atom ( $Q$  in  $e$ ) and bond length of N-N ( $d_{N-N}$  in Å) N<sub>2</sub> adsorbed on Mn@GY using DFT and DFT+U calculation, respectively.

|                |       |             |             |
|----------------|-------|-------------|-------------|
| *N-N           | DFT   | DFT+U (U=4) | DFT+U (U=6) |
| $E_{ads}$ (eV) | -0.33 | -0.54       | -0.47       |
| $Q$ ( $e$ )    | 5.57  | 5.77        | 5.57        |
| $d_{N-N}$ (Å)  | 1.14  | 1.12        | 1.13        |
